# Supplementary material for: Plant-Based Beverages as Good Sources of Free and Glycosidic Plant Sterols
Source: MDPI journal article supplement (doi:10.3390/nu10010021), 2017-12-29
Supplement: s1 [file s1]

**Table S1. Supplementary material.** Detailed composition of the diverse beverages analyzed, including beverage category (group), beverage name, health claims listed, main ingredients, ingredients percentage, added sugars and/or sweeteners, vitamins, minerals, stabilizers and thickeners used, energy, fat, carbohydrates, fibers, proteins, salt content and alcohol percentage.

| Category         | Name                             | Health claims                                                                                                                                        | Main ingredients (not mentioned separately →)                                                                                                                                                                                                                                                                                                                                                                                                  | %                       | Added sugar sweeteners                                | Vitamins*                      | µg per 100 mL        | Minerals | mg per 100 mL | Stabilizers Thickeners | Energy (kcal per 100 mL) | Fats (g per 100 mL) (of which saturated) | Carbohydrates (g per 100 mL) (of which sugars) | Fibres (g per 100 mL) | Proteins (g per 100 mL) | Salt (g per 100 mL) | Alcohol (V/V%) |
|------------------|----------------------------------|------------------------------------------------------------------------------------------------------------------------------------------------------|------------------------------------------------------------------------------------------------------------------------------------------------------------------------------------------------------------------------------------------------------------------------------------------------------------------------------------------------------------------------------------------------------------------------------------------------|-------------------------|-------------------------------------------------------|--------------------------------|----------------------|----------|---------------|------------------------|--------------------------|------------------------------------------|------------------------------------------------|-----------------------|-------------------------|---------------------|----------------|
| Fruit juices     | Apple juice                      | 100% fruit                                                                                                                                           | Water<br>Apple juice (concentrated)                                                                                                                                                                                                                                                                                                                                                                                                            | 100                     | /                                                     | Vit C                          | 20000                | /        | /             | /                      | 47                       | 0.0 (0.0)                                | 11.3 (11.3)                                    | /                     | 0.0                     | 0                   | 0.0            |
|                  | Orange juice                     | 100% orange juice<br>Unsweetened                                                                                                                     | Water<br>Orange juice (concentrated)                                                                                                                                                                                                                                                                                                                                                                                                           | 100                     | /                                                     | Vit C                          | 20000                | /        | /             | /                      | 47                       | 0.0 (0.0)                                | 11.3 (11.3)                                    | /                     | 0.7                     | 0                   | 0.0            |
|                  | Pomegranate juice                | Gluten-free<br>Dairy-free<br>Soy-free<br>Egg-free**<br>100% fruit                                                                                    | Pomegranate juice                                                                                                                                                                                                                                                                                                                                                                                                                              | 100                     | /                                                     | Vit C                          | ?                    | /        | /             | /                      | 51                       | 0.0 (0.0)                                | 12.3 (12.3)                                    | 0.0                   | 0.3                     | 0.0                 | 0.0            |
|                  | Tropical multifruit-carrot juice | Low energy (low-calorie)<br>Source of vit A<br>Source of vit C<br>Source of vit E                                                                    | Water<br>Orange juice (and sauce) (concentrated)<br>Pine apple juice (and sauce) (concentrated)<br>Kiwi juice (and sauce) (concentrated)<br>Banana juice (and sauce) (concentrated)<br>Passion fruit juice (and sauce) (concentrated)<br>Mango juice (and sauce) (concentrated)<br>Lime juice (and sauce) (concentrated)<br>Papaya juice (and sauce) (concentrated)<br>Carrot juice (concentrated)<br>Aromas<br>Citric acid (acidic regulator) | 19<br>18<br>3<br>3<br>5 | Acesulfame K<br>Sodium saccharin<br>Natrium cyclamate | Vit C<br>Vit E<br>Provitamin A | 40000<br>6000<br>400 | /        | /             | /                      | 18                       | 0.0 (0.0)                                | 4.0 (4.0)                                      | 0                     | 0.3                     | 0                   | 0.0            |
|                  | Fresh orange-banana juice        | Source of fibre (3 g/100 g or 1.5 g/ 100 kcal)<br>100% fruit<br>Freshly squeezed                                                                     | Orange juice<br>Banana                                                                                                                                                                                                                                                                                                                                                                                                                         | 80<br>20                | /                                                     | /                              | /                    | /        | /             | /                      | 50                       | 0.0 (0.0)                                | 11.2 (11.2)                                    | 0.8                   | 0.8                     | 0                   | 0.0            |
|                  |                                  |                                                                                                                                                      |                                                                                                                                                                                                                                                                                                                                                                                                                                                |                         |                                                       |                                |                      |          |               |                        |                          |                                          |                                                |                       |                         |                     |                |
| Vegetable juices | Tomato juice                     | /                                                                                                                                                    | Tomato juice (concentrated)<br>Lemon juice (concentrated)<br>Salt                                                                                                                                                                                                                                                                                                                                                                              | >99                     | /                                                     | /                              | /                    | /        | /             | /                      | 14                       | <0.2 (<0.1)                              | 2.6 (2.6)                                      | 0.0                   | 0.8                     | 0.61                | 0.0            |
|                  | Mixed vegetable juice (a)        | Source of fibre (3 g/100 g or 1.5 g/ 100 kcal)<br>Gluten-free<br>Lactose-free<br>No added sugars<br>No preservatives<br>No colorants<br>100% vegetal | Tomato juice (concentrated)<br>Carrot juice (concentrated)<br>Celery (concentrated)<br>Beetroot juice (concentrated)<br>Parsley (concentrated)<br>Lettuce juice (concentrated)<br>Watercress juice (concentrated)<br>Spinach (concentrated)<br>Salt<br>Spice mix (contains celery)                                                                                                                                                             | 86<br>13                | /                                                     | /                              | /                    | /        | /             | /                      | 18                       | 0.1 (0.0)                                | 3.0 (2.7)                                      | 0.9                   | 0.9                     | 0.68                | 0.0            |
|                  | Mixed vegetable juice (b)        | 100% vegetal                                                                                                                                         | Tomato juice (concentrated)<br>Celery juice<br>Carrot juice<br>Lemon juice (concentrated)<br>Onion juice<br>Beetroot<br>Salt<br>Chervil<br>Basil<br>Spice mix<br>Beet red (coloring agent)<br>Pepper                                                                                                                                                                                                                                           | 79.8<br>19.2<br>0.2     | /                                                     | /                              | /                    | /        | /             | /                      | 25                       | 0.0 (0.0)                                | 5.9 (5.9)                                      | 0.3                   | 0.5                     | 0.75                | 0.0            |
|                  | Beetroot juice                   | Organic (BE-BIO-O2 and O1 EU/non-EU)                                                                                                                 | Beetroot juice<br>Acerola juice                                                                                                                                                                                                                                                                                                                                                                                                                | 99<br>1                 | /                                                     | /                              | /                    | /        | /             | /                      | 37                       | 0.1 (0.0)                                | 7.9 (7.9)                                      | 0.2                   | 1.1                     | 0.08                | 0.0            |
|                  | Carrot juice                     | Organic (BE-BIO-O2 and O1 EU/non-EU)                                                                                                                 | Carrot juice (concentrated)<br>Lemon juice (concentrated)                                                                                                                                                                                                                                                                                                                                                                                      | 99<br>1                 | /                                                     | /                              | /                    | /        | /             | /                      | 22                       | 0.0 (0.0)                                | 4.7 (4.7)                                      | 0.3                   | 0.6                     | 0.17                | 0.0            |
|                  |                                  |                                                                                                                                                      |                                                                                                                                                                                                                                                                                                                                                                                                                                                |                         |                                                       |                                |                      |          |               |                        |                          |                                          |                                                |                       |                         |                     |                |
|                  |                                  |                                                                                                                                                      |                                                                                                                                                                                                                                                                                                                                                                                                                                                |                         |                                                       |                                |                      |          |               |                        |                          |                                          |                                                |                       |                         |                     |                |

\* Some beverages do contain ascorbic acid as an antioxidant, but if the exact dose per 100 mL is not mentioned on the label it is not included here, only in the main ingredients list

\*\* Does not contain: tree nuts, soybeans, peanuts, eggs, sulfite, mollusks, crustaceans, celery, lupines, milk, fish, mustard, sesame, gluten

**Table S1. Supplementary material.** Detailed composition of the diverse beverages analyzed, including beverage category (group), beverage name, health claims listed, main ingredients, ingredients percentage, added sugars and/or sweeteners, vitamins, minerals, stabilizers and thickeners used, energy, fat, carbohydrates, fibers, proteins, salt content and alcohol percentage.

| Category                      | Name         | Health claims                                                                                                                                                                                                                                                                                    | Main ingredients (not mentioned separately →)                                                                                                                         | %          | Added sugar sweeteners | Vitamins*                            | µg per 100 mL               | Minerals | mg per 100 mL | Stabilizers Thickeners                 | Energy (kcal per 100 mL) | Fats (g per 100 mL) (of which saturated) | Carbohydrates (g per 100 mL) (of which sugars) | Fibres (g per 100 mL) | Proteins (g per 100 mL) | Salt (g per 100 mL) | Alcohol (V/V%) |
|-------------------------------|--------------|--------------------------------------------------------------------------------------------------------------------------------------------------------------------------------------------------------------------------------------------------------------------------------------------------|-----------------------------------------------------------------------------------------------------------------------------------------------------------------------|------------|------------------------|--------------------------------------|-----------------------------|----------|---------------|----------------------------------------|--------------------------|------------------------------------------|------------------------------------------------|-----------------------|-------------------------|---------------------|----------------|
| Plant-based milk alternatives | Coconut/rice | Low energy (low-calorie)<br>Gluten-free<br>Dairy-free<br>Milk-free<br>Lactose-free<br>No added sugars<br>100% vegetal<br>Source of vit B12<br>Naturally low in saturated fat<br>Easy to digest                                                                                                   | Water<br>Coconut milk (coconut cream and water)<br>Rice<br>Tricalcium phosphate<br>Salt (sea)<br>Aromas                                                               | 5.3<br>3.3 | /                      | Vit B2<br>Vit D2                     | 0.38<br>0.75                | Ca       | 120           | Carrageenan<br>Guar gum<br>Xanthan gum | 20                       | 0.9 (0.9)                                | 2.7 (1.9)                                      | 0.0                   | 0.1                     | 0.13                | 0.0            |
|                               | Rice         | Vegetarian<br>Source of calcium<br>Source of vit B2<br>Source of vit B12<br>Source of vit D2<br>Extra <3                                                                                                                                                                                         | Water<br>Rice<br>Sunflower oil<br>Calcium carbonate<br>Salt                                                                                                           | 13.4       | /                      | Vit B2<br>Vit B12<br>Vit D           | 210<br>0.38<br>0.75         | Ca       | 120           | Gellan gum                             | 58                       | 1.0 (0.1)                                | 12.0 (2.9)                                     | 0.3                   | 0.2                     | 0.1                 | 0.0            |
|                               | Soy          | Dairy-free<br>Milk-free<br>Gluten-free<br>Lactose-free<br>100% vegetal<br>Naturally low in saturated fat<br>Low in fat<br>No colorants<br>Free of preservatives<br>Source of protein<br>Source of vit B12<br>Source of vit D<br>Source of vit B2<br>Source of calcium<br>Vegan<br>Easy to digest | Water<br>Soy beans (pealed)<br>Tricalcium phosphate<br>Monopotassium phosphate (acid regulator)<br>Salt<br>Aromas                                                     | 5.9        | Sugar                  | B2<br>Vit B12<br>Vit D2              | 210<br>0.38<br>0.75         | Ca       | 120           | Gellan gum                             | 39                       | 1.8 (0.3)                                | 2.5 (2.5)                                      | 0.5                   | 3.0                     | 0.11                | 0.0            |
|                               | Cashew       | Dairy-free<br>Gluten-free<br>Low in fat<br>Low in sugar<br>Source of vit D<br>Source of vit B2<br>Source of vit B12<br>Source of calcium                                                                                                                                                         | Water<br>Cashew nuts<br>Tricalcium phosphate<br>Salt<br>Sunflower lecithine (emulsifier)                                                                              | 3.1        | Sugar                  | Vit B2<br>Vit B12<br>Vit D2<br>Vit E | 210<br>0.38<br>0.75<br>1800 | Ca       | 120           | Locust bean gum<br>Gellan gum          | 23                       | 1.1 (0.2)                                | 2.6 (2.0)                                      | 0.2                   | 0.5                     | 0.13                | 0.0            |
|                               | Almond (a)   | Dairy-free<br>Gluten-free<br>Low in fat<br>Source of vit E<br>Source of vit D                                                                                                                                                                                                                    | Water<br>Almond<br>Tricalcium phosphate<br>Salt<br>Sunflower lecithine (emulsifier)                                                                                   | 2.1        | Sugar                  | Vit B2<br>Vit B12<br>Vit E<br>Vit D2 | 210<br>0.38<br>1800<br>0.75 | Ca       | 120           | Locust bean gum<br>Gellan gum          | 24                       | 1.1 (0.1)                                | 3.0 (3.0)                                      | 0.2                   | 0.5                     | 0.14                | 0.0            |
|                               | Almond (b)   | Dairy-free<br>Gluten-free<br>No added sugars<br>Source of vit E<br>Source of vit D<br>Source of vit B2<br>Source of vit B12<br>Source of calcium                                                                                                                                                 | Water<br>Almond<br>Tricalcium phosphate<br>Salt<br>Sunflower lecithine (emulsifier)<br>Aromas                                                                         | 2.1        | /                      | Vit B2<br>Vit B12<br>Vit D2<br>Vit E | 210<br>0.38<br>0.75<br>1800 | Ca       | 120           | Locust bean gum<br>Gellan gum          | 13                       | 1.3 (0.1)                                | 0.1 (0.1)                                      | 0.2                   | 0.5                     | 0.14                | 0.0            |
|                               | Oat (a)      | Natural ingredients<br>No added sugars<br>Soy-free<br>Source of fibre (3 g/100 g or 1.5 g/ 100 kcal)<br>Milk-free<br>Lactose-free<br>Source of calcium<br>Source of vit B12<br>Source of vit D<br>Vegan<br>Vegetarian<br>Low in fat<br>Halal                                                     | Water<br>Oats<br>Sunflower oil<br>Tricalcium phosphate<br>Salt (sea)                                                                                                  | 16         | /                      | vit D2<br>Vit B12                    | 0.75<br>0.375               | Ca       | 120           | Acacia gum (gum arabic)                | 52                       | 1.4 (0.3)                                | 8.9 (5.9)                                      | 1.0                   | 0.4                     | 0.12                | 0.0            |
|                               | Oat (b)      | Milk-free<br>Soy-free<br>100% vegetal<br>Source of fibre (3 g/100 g or 1.5 g/ 100 kcal)<br>0.4 g beta-glucan/100 mL<br>Doesn't contain coconut, rice or nuts                                                                                                                                     | Water<br>Oats<br>Canola oil<br>Calcium carbonate<br>Tricalcium phosphate (and other)<br>Salt                                                                          | 10         | /                      | Vit D2<br>Riboflavine<br>Vit B12     | 1.5<br>210<br>0.38          | Ca       | 120           | /                                      | 45                       | 1.5 (0.2)                                | 6.5 (4.0)                                      | 0.8                   | 1.0                     | 0.1                 | 0.0            |
| Gel                           | Aloë Vera    | Gluten-free<br>Vegan<br>Vegetarian<br>Halal<br>Beneficial for maintaining a healthy digestive system                                                                                                                                                                                             | Stabilized Aloë Vera inner leaf gel<br>Citric acid (acidic regulator)<br>Ascorbic acid (antioxidant)<br>Potassium benzoate (preservative)<br>Tocopherol (antioxidant) | 96         | Sorbitol               | /                                    | /                           | /        | /             | Xanthan gum                            | 17                       | 0.0 (0.0)                                | 5.0 (0.0)                                      | /                     | 0.0                     | 0.25                | 0.0            |

\* Some beverages do contain ascorbic acid as an antioxidant, but if the exact dose per 100 mL is not mentioned on the label it is not included here, only in the main ingredients list

**Table S1. Supplementary material.** Detailed composition of the diverse beverages analyzed, including beverage category (group), beverage name, health claims listed, main ingredients, ingredients percentage, added sugars and/or sweeteners, vitamins, minerals, stabilizers and thickeners used, energy, fat, carbohydrates, fibers, proteins, salt content and alcohol percentage.

| Category                                       | Name                                     | Health claims                                                                                                                       | Main ingredients (not mentioned separately -->) | %                                                     | Added sugar sweeteners     | Vitamins* | µg per 100 mL | Minerals | mg per 100 mL                          | Stabilizers Thickeners | Energy (kcal per 100 mL) | Fats (g per 100 mL) (of which saturated) | Carbohydrates (g per 100 mL) (of which sugars) | Fibres (g per 100 mL) | Proteins (g per 100 mL) | Salt (g per 100 mL) | Alcohol (V/V%) |
|------------------------------------------------|------------------------------------------|-------------------------------------------------------------------------------------------------------------------------------------|-------------------------------------------------|-------------------------------------------------------|----------------------------|-----------|---------------|----------|----------------------------------------|------------------------|--------------------------|------------------------------------------|------------------------------------------------|-----------------------|-------------------------|---------------------|----------------|
| Sodas                                          | Lemonade (orange)                        | With orange-juice                                                                                                                   | Orange juice (concentrated)                     | 6                                                     | Sugar                      | /         |               |          |                                        | Guar gum               | 48                       | 0.0 (0.0)                                | 11.7 (11.7)                                    | /                     | 0.0                     | 0                   | 0.0            |
|                                                |                                          |                                                                                                                                     | Citric acid (acidic regulator)                  |                                                       |                            |           |               |          |                                        |                        |                          |                                          |                                                |                       |                         |                     |                |
|                                                |                                          |                                                                                                                                     | Sodium citrate                                  |                                                       |                            |           |               |          |                                        |                        |                          |                                          |                                                |                       |                         |                     |                |
|                                                |                                          |                                                                                                                                     | Potassium sorbate (preservative)                |                                                       |                            |           |               |          |                                        |                        |                          |                                          |                                                |                       |                         |                     |                |
|                                                |                                          |                                                                                                                                     | Aromas                                          |                                                       |                            |           |               |          |                                        |                        |                          |                                          |                                                |                       |                         |                     |                |
|                                                |                                          |                                                                                                                                     | Ascorbic acid (antioxidant)                     |                                                       |                            |           |               |          |                                        |                        |                          |                                          |                                                |                       |                         |                     |                |
|                                                | Carrot juice (concentrated)              |                                                                                                                                     |                                                 |                                                       |                            |           |               |          |                                        |                        |                          |                                          |                                                |                       |                         |                     |                |
|                                                | Biolemonade (a) (elderberry)             | Gluten-free<br>Biological origin<br>Kosher<br>Vegetarian<br>Vegan<br>No preservatives<br>No colorants<br>Non-alcoholic              | Water                                           |                                                       | Sugar                      | /         |               |          |                                        | /                      | 22                       | <0.5 (<0.1)                              | 5.0 (5.0)                                      | /                     | <0.5                    | <0.1                | 0.0            |
|                                                |                                          |                                                                                                                                     | Barley malt                                     |                                                       |                            |           |               |          |                                        |                        |                          |                                          |                                                |                       |                         |                     |                |
|                                                |                                          |                                                                                                                                     | Elderberry juice (concentrated)                 | 2                                                     |                            |           |               |          |                                        |                        |                          |                                          |                                                |                       |                         |                     |                |
|                                                |                                          |                                                                                                                                     | Carbondioxide                                   |                                                       |                            |           |               |          |                                        |                        |                          |                                          |                                                |                       |                         |                     |                |
|                                                |                                          |                                                                                                                                     | Aromas                                          |                                                       |                            |           |               |          |                                        |                        |                          |                                          |                                                |                       |                         |                     |                |
|                                                |                                          |                                                                                                                                     | Calcium carbonate                               |                                                       |                            |           |               |          |                                        |                        |                          |                                          |                                                |                       |                         |                     |                |
|                                                | Magnesium carbonate                      |                                                                                                                                     |                                                 |                                                       |                            |           |               |          |                                        |                        |                          |                                          |                                                |                       |                         |                     |                |
|                                                | Biolemonade (b) (orange-ginger)          | Organic (DE-OKO-003 EU/non-EU)<br>Kosher<br>Vegetarian<br>Vegan<br>No preservatives<br>No colorants<br>Gluten-free<br>Non-alcoholic | Water                                           |                                                       | Sugar                      | /         |               |          |                                        | /                      | 19                       | <0.5 (<0.1)                              | 4.3 (4.3)                                      | /                     | <0.5                    | <0.01               | 0.0            |
|                                                |                                          |                                                                                                                                     | Barley malt                                     |                                                       |                            |           |               |          |                                        |                        |                          |                                          |                                                |                       |                         |                     |                |
|                                                |                                          |                                                                                                                                     | Elderberry juice (concentrated)                 | 2                                                     |                            |           |               |          |                                        |                        |                          |                                          |                                                |                       |                         |                     |                |
|                                                |                                          |                                                                                                                                     | Carbondioxide                                   |                                                       |                            |           |               |          |                                        |                        |                          |                                          |                                                |                       |                         |                     |                |
|                                                |                                          |                                                                                                                                     | Aromas                                          |                                                       |                            |           |               |          |                                        |                        |                          |                                          |                                                |                       |                         |                     |                |
|                                                |                                          |                                                                                                                                     | Ginger extract                                  |                                                       |                            |           |               |          |                                        |                        |                          |                                          |                                                |                       |                         |                     |                |
|                                                | Orange juice (extract)                   | 2                                                                                                                                   |                                                 |                                                       |                            |           |               |          |                                        |                        |                          |                                          |                                                |                       |                         |                     |                |
|                                                | Calcium carbonate                        |                                                                                                                                     |                                                 |                                                       |                            |           |               |          |                                        |                        |                          |                                          |                                                |                       |                         |                     |                |
|                                                | Magnesium carbonate                      |                                                                                                                                     |                                                 |                                                       |                            |           |               |          |                                        |                        |                          |                                          |                                                |                       |                         |                     |                |
|                                                | Soda with plant extract (a)              | /                                                                                                                                   | Water (carbonated)                              |                                                       | Sugar                      | /         |               |          | /                                      | not labeled            | 42                       | 0.0 (0.0)                                | 10.6 (10.6)                                    | /                     | 0.0                     | 0.013               | 0.0            |
| Caramel (E 150d)                               |                                          |                                                                                                                                     |                                                 |                                                       |                            |           |               |          |                                        |                        |                          |                                          |                                                |                       |                         |                     |                |
| Soda with plant extract (b) (stevia sweetened) | 45% less sugar<br>45% less calories      | Phosphoric acid                                                                                                                     |                                                 | Sugar<br>Steviolglycosides                            | /                          |           |               | /        | not labeled                            | 27                     | 0.0 (0.0)                | 5.8 (5.8)                                | /                                              | 0.0                   | 0                       | 0.0                 |                |
|                                                |                                          | Aromas (plant extracts)                                                                                                             |                                                 |                                                       |                            |           |               |          |                                        |                        |                          |                                          |                                                |                       |                         |                     |                |
|                                                |                                          | Caffeine                                                                                                                            | 0.010                                           |                                                       |                            |           |               |          |                                        |                        |                          |                                          |                                                |                       |                         |                     |                |
|                                                |                                          | Water (carbonated)                                                                                                                  |                                                 |                                                       |                            |           |               |          |                                        |                        |                          |                                          |                                                |                       |                         |                     |                |
| Soda with plant extract (c) (peach)            | /                                        | Caramel (E 150d)                                                                                                                    |                                                 | Sugar                                                 | Vit B6                     | 110       |               | /        | Acacia gum (gum arabic)<br>Wood rosins | 31                     | 0.0 (0.0)                | 7.4 (7.4)                                | /                                              | 0.0                   | 0.06                    | 0.0                 |                |
|                                                |                                          | Phosphoric acid                                                                                                                     |                                                 |                                                       |                            |           |               |          |                                        |                        |                          |                                          |                                                |                       |                         |                     |                |
|                                                |                                          | Aromas (plant extracts)                                                                                                             |                                                 |                                                       |                            |           |               |          |                                        |                        |                          |                                          |                                                |                       |                         |                     |                |
|                                                |                                          | Caffeine                                                                                                                            | 0.008                                           |                                                       |                            |           |               |          |                                        |                        |                          |                                          |                                                |                       |                         |                     |                |
|                                                |                                          | Water                                                                                                                               |                                                 |                                                       |                            |           |               |          |                                        |                        |                          |                                          |                                                |                       |                         |                     |                |
|                                                |                                          | Citric acid (acidic regulator)                                                                                                      |                                                 |                                                       |                            |           |               |          |                                        |                        |                          |                                          |                                                |                       |                         |                     |                |
|                                                |                                          | Carrot juice (concentrated)                                                                                                         |                                                 |                                                       |                            |           |               |          |                                        |                        |                          |                                          |                                                |                       |                         |                     |                |
|                                                |                                          | Zwarte bessenconcentraat                                                                                                            |                                                 |                                                       |                            |           |               |          |                                        |                        |                          |                                          |                                                |                       |                         |                     |                |
|                                                |                                          | Aromas                                                                                                                              |                                                 |                                                       |                            |           |               |          |                                        |                        |                          |                                          |                                                |                       |                         |                     |                |
|                                                |                                          | Salt                                                                                                                                |                                                 |                                                       |                            |           |               |          |                                        |                        |                          |                                          |                                                |                       |                         |                     |                |
| Sodium citrate                                 |                                          |                                                                                                                                     |                                                 |                                                       |                            |           |               |          |                                        |                        |                          |                                          |                                                |                       |                         |                     |                |
| Potassium phosphate                            |                                          |                                                                                                                                     |                                                 |                                                       |                            |           |               |          |                                        |                        |                          |                                          |                                                |                       |                         |                     |                |
| Calcium phosphate                              |                                          |                                                                                                                                     |                                                 |                                                       |                            |           |               |          |                                        |                        |                          |                                          |                                                |                       |                         |                     |                |
| Carotenes (coloring agent)                     |                                          |                                                                                                                                     |                                                 |                                                       |                            |           |               |          |                                        |                        |                          |                                          |                                                |                       |                         |                     |                |
| Teas                                           | Tea infusion-based drink (a)             | Low energy (low-calorie)<br>Natural ingredients                                                                                     | Fruit tea extract (water and herbal mix)        | 5.1                                                   | Sugar (beetroot)           | /         |               |          | /                                      | /                      | 19                       | <0.1 (<0.1)                              | 4.6 (4.5)                                      | /                     | 0.1                     | 0.008               | 0.0            |
|                                                |                                          |                                                                                                                                     | Cranberry juice                                 |                                                       |                            |           |               |          |                                        |                        |                          |                                          |                                                |                       |                         |                     |                |
|                                                |                                          |                                                                                                                                     | Apple berry juice (concentrated)                |                                                       |                            |           |               |          |                                        |                        |                          |                                          |                                                |                       |                         |                     |                |
|                                                |                                          |                                                                                                                                     | Apple juice (concentrated)                      |                                                       |                            |           |               |          |                                        |                        |                          |                                          |                                                |                       |                         |                     |                |
|                                                |                                          |                                                                                                                                     | Elderberry juice (concentrated)                 |                                                       |                            |           |               |          |                                        |                        |                          |                                          |                                                |                       |                         |                     |                |
|                                                |                                          |                                                                                                                                     | citron juice (concentrated)                     |                                                       |                            |           |               |          |                                        |                        |                          |                                          |                                                |                       |                         |                     |                |
|                                                | Tea infusion-based drink (b)             | Low energy (low-calorie)<br>No added sugars<br>No preservatives<br>No colorants<br>No flavor-enhancers<br>Natural ingredients       | acerola juice (concentrated)                    |                                                       | Not labeled                | Vit C     | 1600          |          | /                                      | /                      | 19                       | <0.5 (<0.1)                              | 5.0 (5.0)                                      | <0.5                  | <0.5                    | <0.01               | 0.0            |
|                                                |                                          |                                                                                                                                     | Carbonyl dioxide                                |                                                       |                            |           |               |          |                                        |                        |                          |                                          |                                                |                       |                         |                     |                |
|                                                |                                          |                                                                                                                                     | Kombucha starter culture                        |                                                       |                            |           |               |          |                                        |                        |                          |                                          |                                                |                       |                         |                     |                |
|                                                |                                          |                                                                                                                                     | Lactobacillus                                   |                                                       |                            |           |               |          |                                        |                        |                          |                                          |                                                |                       |                         |                     |                |
|                                                |                                          |                                                                                                                                     | Water                                           |                                                       |                            |           |               |          |                                        |                        |                          |                                          |                                                |                       |                         |                     |                |
|                                                |                                          |                                                                                                                                     | fruit extracts                                  |                                                       |                            |           |               |          |                                        |                        |                          |                                          |                                                |                       |                         |                     |                |
|                                                | Tea infusion-based drink (c)             | No artificial flavours<br>No colorants<br>No preservatives<br>made with real brewed tea                                             | Lemon juice (concentrated)                      | 2                                                     | Sugar<br>Steviolglycosides | /         |               |          | /                                      | /                      | 19                       | <0.5 (<0.1)                              | 4.6 (4.5)                                      | 0.0                   | <0.5                    | <0.01               | 0.0            |
|                                                |                                          |                                                                                                                                     | Elder blossom (extract)                         | 0.04                                                  |                            |           |               |          |                                        |                        |                          |                                          |                                                |                       |                         |                     |                |
|                                                |                                          |                                                                                                                                     | Tea-extract (rooibos)                           | 0.28                                                  |                            |           |               |          |                                        |                        |                          |                                          |                                                |                       |                         |                     |                |
| Iced tea (a)                                   | No colorants<br>Low energy (low-calorie) | Prune juice (concentrate)                                                                                                           | 0.2                                             | Sugar (invert sugar)<br>Fructose<br>Steviolglycosides | /                          |           |               | /        | /                                      | 20                     | <0.5 (< 0.1)             | 4.6 (4.5)                                | /                                              | <0.5                  | 0.11                    | 0.0                 |                |
|                                                |                                          | Ascorbic acid (antioxidant)                                                                                                         | 0.003                                           |                                                       |                            |           |               |          |                                        |                        |                          |                                          |                                                |                       |                         |                     |                |
|                                                |                                          | passion flower extract                                                                                                              |                                                 |                                                       |                            |           |               |          |                                        |                        |                          |                                          |                                                |                       |                         |                     |                |
|                                                |                                          | Water                                                                                                                               | 95                                              |                                                       |                            |           |               |          |                                        |                        |                          |                                          |                                                |                       |                         |                     |                |
|                                                |                                          | Tea-extract (black tea)                                                                                                             | 0.1                                             |                                                       |                            |           |               |          |                                        |                        |                          |                                          |                                                |                       |                         |                     |                |
| Iced tea (b)                                   | /                                        | Citric acid (acidic regulator)                                                                                                      |                                                 | Steviolglycosides<br>Sugar<br>Fructose                | /                          |           |               | /        | /                                      | 21                     | 0.0 (0.0)                | 4.8 (4.8)                                | /                                              | 0.0                   | 0.05                    | 0.0                 |                |
|                                                |                                          | Sodium citrate (acidic regulator)                                                                                                   |                                                 |                                                       |                            |           |               |          |                                        |                        |                          |                                          |                                                |                       |                         |                     |                |
|                                                |                                          | Tea-extracts                                                                                                                        |                                                 |                                                       |                            |           |               |          |                                        |                        |                          |                                          |                                                |                       |                         |                     |                |
|                                                |                                          | Potassium sorbate (preservative)                                                                                                    |                                                 |                                                       |                            |           |               |          |                                        |                        |                          |                                          |                                                |                       |                         |                     |                |
|                                                |                                          | Aromas                                                                                                                              |                                                 |                                                       |                            |           |               |          |                                        |                        |                          |                                          |                                                |                       |                         |                     |                |

**Table S1. Supplementary material.** Detailed composition of the diverse beverages analyzed, including beverage category (group), beverage name, health claims listed, main ingredients, ingredients percentage, added sugars and /or sweeteners, vitamins, minerals, stabilizers and thickeners used, energy, fat, carbohydrates, fibers, proteins, salt content and alcohol percentage.

| Category                  | Name                         | Health claims                                                                                            | Main ingredients (not mentioned separately -->)                                                                                                       | %                      | Added sugar sweeteners | Vitamins*                     | µg per 100 mL | Minerals | mg per 100 mL | Stabilizers Thickeners | Energy (kcal per 100 mL) | Fats (g per 100 mL) (of which saturated) | Carbohydrates (g per 100 mL) (of which sugars) | Fibres (g per 100 mL) | Proteins (g per 100 mL) | Salt (g per 100 mL) | Alcohol (V/V%) |
|---------------------------|------------------------------|----------------------------------------------------------------------------------------------------------|-------------------------------------------------------------------------------------------------------------------------------------------------------|------------------------|------------------------|-------------------------------|---------------|----------|---------------|------------------------|--------------------------|------------------------------------------|------------------------------------------------|-----------------------|-------------------------|---------------------|----------------|
| Non-alcoholic malt drinks | Chinese grain drink          | 100% vegetal                                                                                             | Water<br>Grain extract<br>Malt extract (concentrate)<br>Antioxidant (E300)<br>Acidulant (E500)                                                        | 45<br>0.15             | /                      | /                             |               | /        |               | /                      | 0                        | 0.0 (0.0)                                | 0.0 (0.0)                                      | /                     | 0.0                     | 0.017               | 0.0            |
|                           | Icelandic malt drink         | Non-alcoholic                                                                                            | Water<br>Barley<br>Hop<br>Yeast<br>Caramel (E150c)<br>Licorice                                                                                        |                        | Sugar                  | /                             |               | /        |               | /                      | 59                       | 0.0 (0.0)                                | 14.0 (8-11.4)                                  | /                     | 0.5-1                   | 0.01                | 0.0            |
|                           | Non-alcoholic lager (a)      | Non-alcoholic                                                                                            | Water<br>Barley malt<br>Corn<br>Hop<br>Caramel (E150c)                                                                                                |                        | /                      | /                             |               | /        |               | /                      | 26                       | 0.0 (0.0)                                | 6.1 (3.9)                                      | /                     | 0.3                     | < 0.1               | <0.25          |
|                           | Non-alcoholic lager (b)      | Non-alcoholic                                                                                            | Water<br>Barley malt<br>Wheat malt<br>Hop<br>Hop extract                                                                                              |                        | /                      | /                             |               | /        |               | /                      | 26                       | 0.0 (0.0)                                | 6.1 (6.1)                                      | /                     | 0.3                     | <0.1                | 0.4            |
|                           | Non-alcoholic wheat beer (a) | Non-alcoholic                                                                                            | Water<br>Barley malt<br>Wheat<br>Aromas<br>Carbondioxide<br>Citric acid (acidic regulator)<br>Coriander<br>Dried orange peels<br>Hop<br>Apple extract |                        | Sugar                  | /                             |               | /        |               | /                      | 27                       | 0.0 (0.0)                                | 7.4 (3.7)                                      | /                     | 0.5                     | <0.1                | 0.0            |
|                           | Non-alcoholic wheat beer (b) | Contains vit B12<br>Low energy (low-calorie)<br>Contains fytacin<br>Natural<br>Isotonic<br>Non-alcoholic | Water<br>Barley malt<br>Wheat malt<br>Hop<br>Yeast<br>Carbondioxide                                                                                   |                        | /                      | Folic acid/ vit B9<br>Vit B12 | 29.6<br>0.14  | /        |               | /                      | 20                       | 0.0 (0.0)                                | 4.5 (1.3)                                      | /                     | 0.6                     | <0.1                | <0.5           |
| Beers                     | Lager (a)                    | /                                                                                                        | Water<br>Barley malt<br>Corn<br>Hop<br>Caramel (E150c)                                                                                                |                        | /                      | /                             |               | /        |               | /                      | 43                       | 0.0 (0.0)                                | 3.2 (0.1)                                      | /                     | 0.4                     | <0.1                | 5.2            |
|                           | Lager (b)                    | /                                                                                                        | Water<br>Barley malt<br>Hop<br>Caramel (E150c)                                                                                                        |                        | /                      | /                             |               | /        |               | /                      | /                        | /                                        | /                                              | /                     | /                       | <0.1                | 5.2            |
|                           | Lager (c)                    | Reinheitsgebot                                                                                           | Water<br>Barley malt<br>Hop extract                                                                                                                   |                        | /                      | /                             |               | /        |               | /                      | 32                       | 0 (0)                                    | 2.0 (0.0)                                      | /                     | 0.3                     | <0.1                | 5.0            |
|                           | Lager (d)                    | /                                                                                                        | Water<br>Barley malt<br>Hop                                                                                                                           |                        | Sugar                  | /                             |               | /        |               | /                      | /                        | /                                        | /                                              | /                     | /                       | <0.1                | 4.9            |
|                           | Wheat beer (a)               | /                                                                                                        | Water<br>Barley malt<br>Wheat                                                                                                                         | 60 (rel.)<br>40 (rel.) | /                      | /                             |               | /        |               | /                      | /                        | /                                        | /                                              | /                     | /                       | <0.01               | 5.0            |
|                           | Wheat beer (b)               | /                                                                                                        | Water<br>Barley malt<br>Wheat<br>Hop<br>Coriander<br>Dried orange peels                                                                               |                        | /                      | /                             |               | /        |               | /                      | /                        | /                                        | /                                              | /                     | /                       | <0.1                | 4.9            |
|                           | Wheat beer (c)               | /                                                                                                        | Water<br>Barley malt<br>Wheat                                                                                                                         |                        | /                      | /                             |               | /        |               | /                      | /                        | /                                        | /                                              | /                     | /                       | <0.1                | 4.5            |
|                           | Wheat beer (d)               | /                                                                                                        | Water<br>Barley malt<br>Wheat malt<br>Hop<br>Coriander<br>Orange peels                                                                                |                        | /                      | /                             |               | /        |               | /                      | /                        | /                                        | /                                              | /                     | /                       | <0.1                | 4.7            |
|                           | Ale (bottle fermented) (a)   | /                                                                                                        | Water<br>Barley malt<br>Hop<br>Yeast                                                                                                                  | 20                     | Sugar (refermentation) | /                             |               | /        |               | /                      | /                        | <0.5 (0.0)                               | /                                              | /                     | /                       | <0.01               | 7.8            |
|                           | Ale (botle fermented) (b)    | /                                                                                                        | Water<br>Barley malt<br>Hop<br>Hop extract<br>Yeast                                                                                                   |                        | Glucose syrup<br>Sugar | /                             |               | /        |               | /                      | 57                       | 0 (0)                                    | 4.0 (0.0)                                      | /                     | 0.4                     | <0.01               | 7.0            |
|                           | Ale (bottle fermented) (c)   | /                                                                                                        | Water<br>Barley malt<br>Hop<br>Yeast                                                                                                                  |                        | /                      | /                             |               | /        |               | /                      | 56                       | <0.5 (0.0)                               | /                                              | /                     | /                       | <0.01               | 8.0            |
|                           | Ale (bottle fermented) (d)   | /                                                                                                        | Water<br>Barley malt<br>Hop<br>Yeast                                                                                                                  |                        | Sugar (refermentation) | /                             |               | /        |               | /                      | 52                       | <0.5 (0.0)                               | 3.8 (0.0)                                      | /                     | <0.5                    | <0.01               | 8.5            |
|                           | Ale (bottle fermented) (e)   | /                                                                                                        | Water<br>Barley malt<br>Hop<br>Yeast                                                                                                                  |                        | Sugar                  | /                             |               | /        |               | /                      | 58                       | <0.5 (0.0)                               | 4.3 (<0.5)                                     | /                     | 0.5                     | <0.01               | 6.8            |

\* Some beverages do contain ascorbic acid as an antioxidant, but if the exact dose per 100 mL is not mentioned on the label it is not included here, only in the main ingredients list
